# Supplementary material for: Asymmetric impact of groundwater use on groundwater droughts
Source: Copernicus journal article supplement (doi:10.5194/hess-2020-22), 2020-01-31
Supplement: Supplementary file 1 [file hess-2020-22-supplement.pdf]

## Supplementary material of Asymmetric impact of groundwater use on groundwater droughts

Doris E Wendt<sup>1</sup>, Anne F Van Loon<sup>1</sup>, John P Bloomfield<sup>2</sup>, David M Hannah<sup>1</sup>

1: University of Birmingham, Birmingham, UK

2: British Geological Survey, Wallingford, UK

### 5 S1: Location and purpose of groundwater abstraction wells in the four water management units in the UK

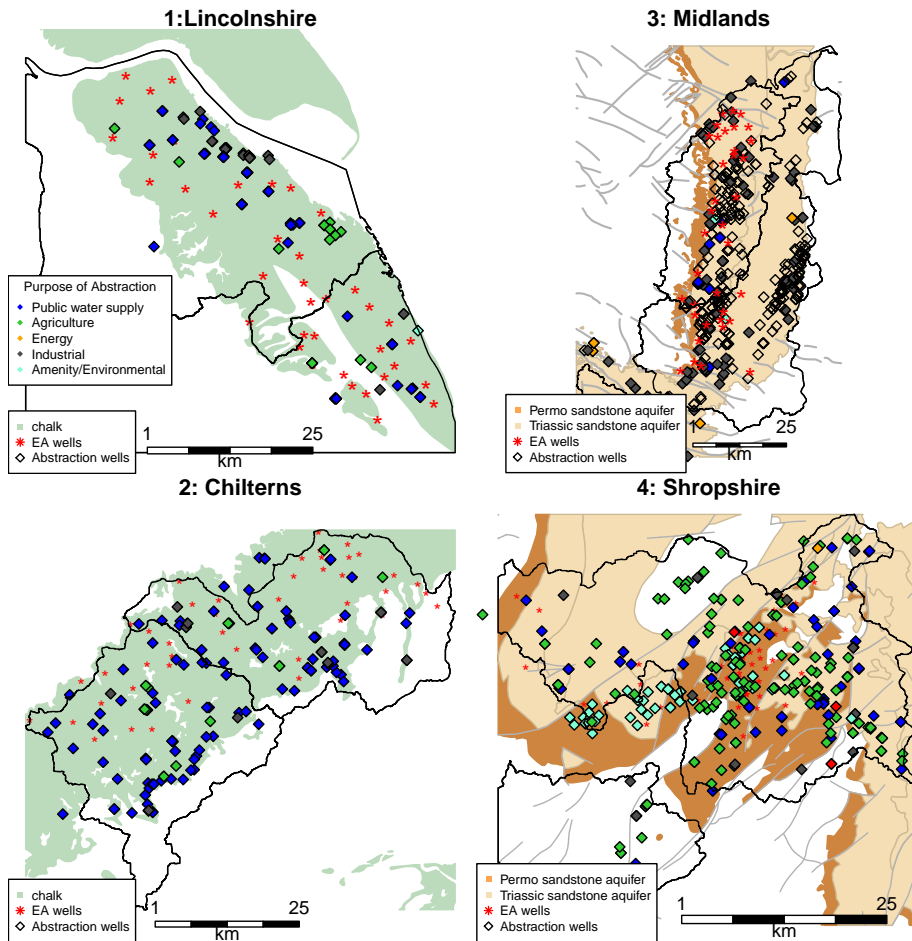

**Figure S1.** The location and purpose of groundwater abstraction wells in the four water management units. The coloured diamonds indicate locations of abstraction wells and the colours represent the purpose of a provided abstraction licence. Please note that some wells overlap.

## S2: Cluster composition of three clustering techniques applied to near-natural standardised time series

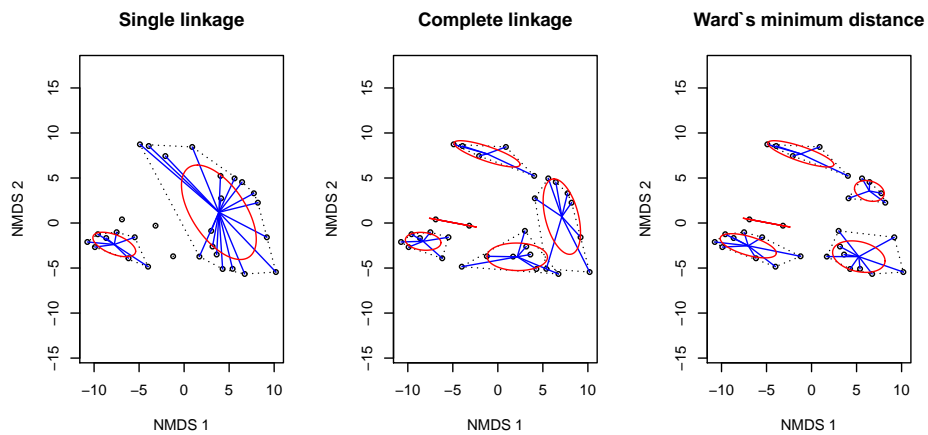

**Figure S2.** Cluster composition of three clustering techniques (single linkage, complete linkage, and Ward's minimum) shown for the five Chalk clusters using the matrix non-metric multidimensional scaling plot (NMDS) of the vegan package (Dixon, 2003). The clusters in Ward's minimum technique show the least overlap and are therefore selected in further analysis.

### S3: Accumulation period of monitoring wells in the four water management units in the UK

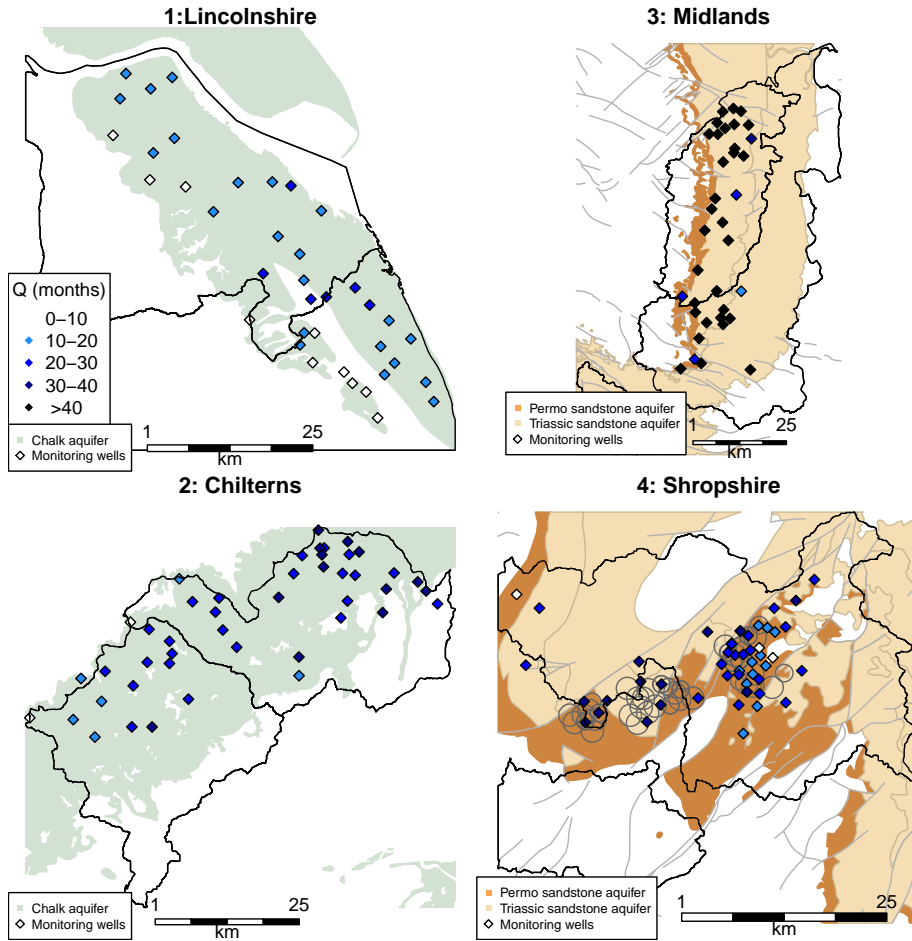

Figure S3. Accumulation period (in months) for monitoring wells in the four water management units.

## References

Dixon, P.: VEGAN, a package of R functions for community ecology, *Journal of Vegetation Science*, 14, 927–930, doi:10.1111/j.1654-1103.2003.tb02228.x, 2003.
